# Supplementary material
Source: Springer Nature journal article supplement (https://www.springermedizin.de/resource/supplementary/12943_2012_1024_MOESM7_ESM.pdf/9552128)

(A)   
 .....1140.....1150.....1160.....1170.....1180.....1190.....  
 Human GUUCCUAGGACUUCUUAUGGGUCUACAGUUCUAUGUUAGACCAUGAAACAUUUGCAUACACAUCGU  
 Chimpanzee GUUCCUAGGACUUCUUAUGGGUCUACAGUUCUAUGUUAGACCAUGAAACAUUUGCAUACACAUCGU  
 Mouse GUUACUAGGACUUCUUAUGGGUCUCUCAGUUCUAUGUUAGACCUGAAACAUUUGCAUACACAUCGU  
 Rat GUUACUAGGACUUCUUAUGGGUCUCUCAGUUCUAUGUUAGACCUGAAACAUUUGCAUACACAUCGU  
 Rabbit GUUACUGGGACUUCUUAUGGGUCUACAGUUCUAUGUUAGACCUGAAACAUUUGCAUACACAUCAU  
 Cat GUUACUAGGACUUCUUAUGGGUCUACAGUUCUAUGUUAGACCAUGAAACAUUUGCAUACACAUCGU  
 Lizard AUUAUUGAGACUUC-AAAAGGGUCUGGCAGUUCUAUGUUAGACCACGGAUCAUUUGCAUACACAUGU  
 Chicken UUAUUUAUAGACUUCUGAAGGGUCUUGCAGUUCUAUGUUAGACCAUGGAUCAUUUGCAUACACAUGU  
 Mir-376c seed  
 1162-1168 of IGF1R-3'UTR 5'CAUGGGUCUACAGUUCUAUGUU...  
 |||||  
 hsa-miR-376c 3'UGCACCUAAAGGAGAUACAA  
  
 .....1290.....1300.....1310.....1320.....1330.....  
 Human UUGUUCUUGAUCUUUGUGGAUUUAAUCUAU--GAAAACCUUCAGGUCCA-CCC-UCUCCCCUU  
 Chimpanzee UUGUUCUUGAUCUUUGUGGAUUUAAUCUAU--GAAAACCUUCAGGUCCA-CCC-UCUCCCCUU  
 Mouse UUGUUCUUAUCUUUGUGGAUUUAAUCUAU--GAAA-CUUUCAGGUCUACCCC-UUCUCCUU  
 Rat UUGUUCUUUAUCUUUGUGGAUUUAAUCUAU--GAAA-CUUUCAGGUCUA-CCC-UUCUCCUU  
 Rabbit UCGUUCUUCUCUUUGUGGAUUUAAUCUAU--GAAA-UCUUCAGGUCUCUG-CUUUCUCCUU  
 Cat UUGUUCUUUAUCUUUGUGGAUUUAAUCUAU--GAAAACCUUCAGGUCUA-CCCUCUCCUU  
 Lizard UUGUUCUUUAUCUUUGUGGAUUUAAUCUAUAGAAAUACUUCAGGUCUA-CCCCCUUCCUU  
 Mir-376a seed  
 1307-1314 of IGF1R-3'UTR 5'UUGUGGAUUUAA-UCUAUGAA  
 ||||| |||||  
 hsa-miR-376a 3'UGCACCUAAAAGGAGAUACUA

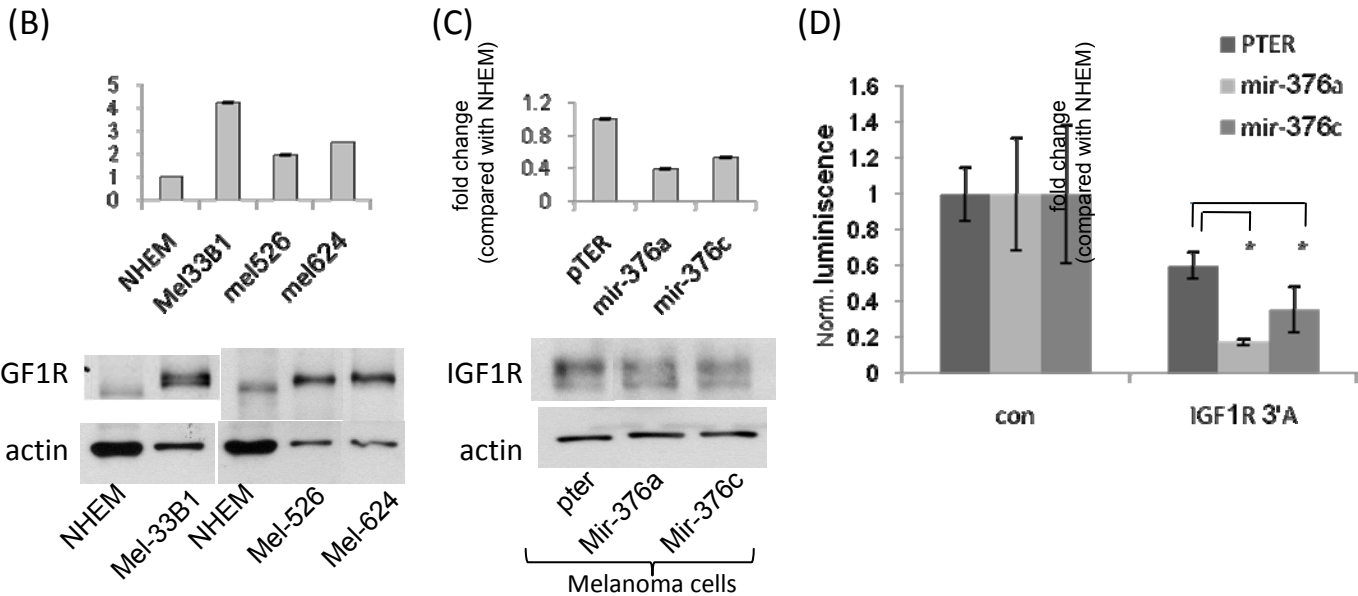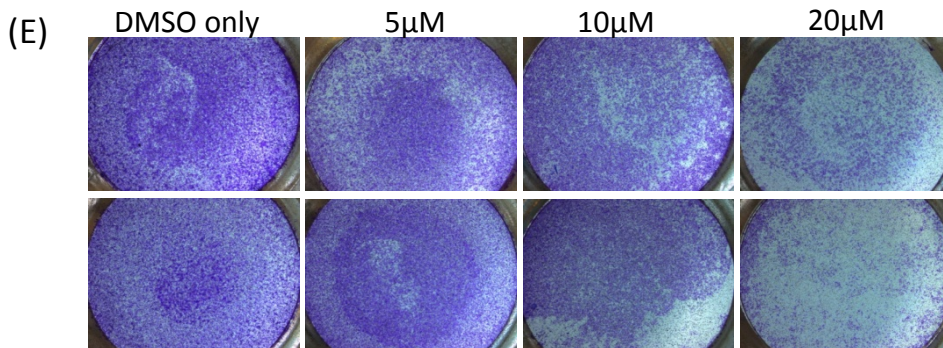

Supplement: MOESM7 [file 9552128]
